# Supplementary material for: The cation-dependent structural, magnetic and optical properties of a family of hypophosphite hybrid perovskites
Source: Royal Society of Chemistry journal article supplement (doi:10.1039/d1dt03382d), 2021-11-29
Supplement: d1dt03382d1.pdf [file d1dt03382d1.pdf]

"The cation-dependent structural, magnetic and optical properties in a family of  
hypophosphite hybrid perovskites"

by Mirosław Mączka et al.

e-mail: [m.maczka@intibs.pl](mailto:m.maczka@intibs.pl)

**Table S1.** Experimental details.

For all structures: monoclinic,  $P2_1/n$ ,  $Z = 4$ . Experiments were carried out at 295 K with Mo  $K\alpha$  radiation using a Xcalibur, Atlas. Absorption was corrected for by multi-scan methods, *CrysAlis PRO* 1.171.38.41 (Rigaku Oxford Diffraction, 2015) Empirical absorption correction using spherical harmonics, implemented in SCALE3 ABSPACK scaling algorithm. Refinement was on 157 parameters. H atoms were treated by a mixture of independent and constrained refinement.

|                                                                            | [Pyr]Mn(H <sub>2</sub> POO) <sub>3</sub>                        | [EtA]Mn(H <sub>2</sub> POO) <sub>3</sub>                        |
|----------------------------------------------------------------------------|-----------------------------------------------------------------|-----------------------------------------------------------------|
| <b>Crystal data</b>                                                        |                                                                 |                                                                 |
| Chemical formula                                                           | C <sub>4</sub> H <sub>16</sub> MnNO <sub>6</sub> P <sub>3</sub> | C <sub>2</sub> H <sub>14</sub> MnNO <sub>7</sub> P <sub>3</sub> |
| $M_r$                                                                      | 322.03                                                          | 311.99                                                          |
| $a, b, c$ (Å)                                                              | 9.7325 (3), 9.1882 (3), 13.4223 (4)                             | 9.4250 (4), 8.8692 (3), 13.4809 (6)                             |
| $\beta$ (°)                                                                | 91.018 (3)                                                      | 93.142 (4)                                                      |
| $V$ (Å <sup>3</sup> )                                                      | 1200.09 (6)                                                     | 1125.20 (8)                                                     |
| $\mu$ (mm <sup>-1</sup> )                                                  | 1.51                                                            | 1.61                                                            |
| Crystal size (mm)                                                          | 0.21 × 0.13 × 0.06                                              | 0.18 × 0.14 × 0.05                                              |
| <b>Data collection</b>                                                     |                                                                 |                                                                 |
| $T_{\min}, T_{\max}$                                                       | 0.960, 1.000                                                    | 0.953, 1.000                                                    |
| No. of measured, independent and observed [ $I > 2\sigma(I)$ ] reflections | 15018, 2973, 2595                                               | 12768, 2774, 2303                                               |
| $R_{\text{int}}$                                                           | 0.022                                                           | 0.026                                                           |
| $(\sin \theta/\lambda)_{\text{max}}$ (Å <sup>-1</sup> )                    | 0.688                                                           | 0.694                                                           |
| <b>Refinement</b>                                                          |                                                                 |                                                                 |
| $R[F^2 > 2\sigma(F^2)], wR(F^2), S$                                        | 0.025, 0.063, 1.05                                              | 0.028, 0.069, 1.05                                              |
| No. of reflections                                                         | 2973                                                            | 2774                                                            |
| No. of restraints                                                          | 0                                                               | 6                                                               |
| $\Delta_{\text{max}}, \Delta_{\text{min}}$ (e Å <sup>-3</sup> )            | 0.31, -0.47                                                     | 0.42, -0.32                                                     |

Computer programs: *CrysAlis PRO* 1.171.38.41 (Rigaku OD, 2015), *SHELXT* 2018/2 (Sheldrick, 2018), *SHELXT* 2014/5 (Sheldrick, 2014), *SHELXL* 2018/3 (Sheldrick, 2018).

**Table S2.** Selected geometric parameters (Å, °).

| <b>[Pyr]Mn(H<sub>2</sub>POO)<sub>3</sub></b> |             |                                        |             |
|----------------------------------------------|-------------|----------------------------------------|-------------|
| Mn1—O5                                       | 2.1621 (12) | P1—O6                                  | 1.4894 (13) |
| Mn1—O5 <sup>i</sup>                          | 2.1621 (12) | P1—O1                                  | 1.5001 (12) |
| Mn1—O4                                       | 2.1866 (12) | P2—O4                                  | 1.4899 (13) |
| Mn1—O4 <sup>i</sup>                          | 2.1866 (12) | P2—O3                                  | 1.4930 (13) |
| Mn1—O1 <sup>ii</sup>                         | 2.1977 (11) | P3—O5                                  | 1.4728 (13) |
| Mn1—O1 <sup>iii</sup>                        | 2.1977 (11) | P3—O2                                  | 1.4943 (13) |
| Mn2—O6 <sup>iv</sup>                         | 2.1615 (12) | N1—C1                                  | 1.500 (2)   |
| Mn2—O6                                       | 2.1615 (12) | N1—C2                                  | 1.505 (2)   |
| Mn2—O3 <sup>iv</sup>                         | 2.1718 (11) | C1—C3                                  | 1.510 (3)   |
| Mn2—O3                                       | 2.1718 (11) | C2—C4                                  | 1.507 (3)   |
| Mn2—O2 <sup>v</sup>                          | 2.2118 (12) | C3—C4                                  | 1.520 (3)   |
| Mn2—O2 <sup>vi</sup>                         | 2.2118 (12) |                                        |             |
|                                              |             |                                        |             |
| O5—Mn1—O5 <sup>i</sup>                       | 180.0       | O6—Mn2—O2 <sup>v</sup>                 | 87.52 (6)   |
| O5—Mn1—O4                                    | 89.30 (5)   | O3 <sup>iv</sup> —Mn2—O2 <sup>v</sup>  | 90.93 (5)   |
| O5 <sup>i</sup> —Mn1—O4                      | 90.70 (5)   | O3—Mn2—O2 <sup>v</sup>                 | 89.07 (5)   |
| O5—Mn1—O4 <sup>i</sup>                       | 90.70 (5)   | O6 <sup>iv</sup> —Mn2—O2 <sup>vi</sup> | 87.52 (6)   |
| O5 <sup>i</sup> —Mn1—O4 <sup>i</sup>         | 89.30 (5)   | O6—Mn2—O2 <sup>vi</sup>                | 92.48 (6)   |
| O4—Mn1—O4 <sup>i</sup>                       | 180.0       | O3 <sup>iv</sup> —Mn2—O2 <sup>vi</sup> | 89.07 (5)   |
| O5—Mn1—O1 <sup>ii</sup>                      | 90.85 (5)   | O3—Mn2—O2 <sup>vi</sup>                | 90.93 (5)   |
| O5 <sup>i</sup> —Mn1—O1 <sup>ii</sup>        | 89.15 (5)   | O2 <sup>v</sup> —Mn2—O2 <sup>vi</sup>  | 180.0       |
| O4—Mn1—O1 <sup>ii</sup>                      | 91.32 (5)   | O6—P1—O1                               | 115.18 (7)  |
| O4 <sup>i</sup> —Mn1—O1 <sup>ii</sup>        | 88.68 (5)   | O4—P2—O3                               | 118.33 (8)  |
| O5—Mn1—O1 <sup>iii</sup>                     | 89.15 (5)   | O5—P3—O2                               | 118.46 (8)  |
| O5 <sup>i</sup> —Mn1—O1 <sup>iii</sup>       | 90.85 (5)   | P1—O1—Mn1 <sup>vii</sup>               | 129.87 (7)  |
| O4—Mn1—O1 <sup>iii</sup>                     | 88.68 (5)   | P3—O2—Mn2 <sup>viii</sup>              | 134.53 (8)  |
| O4 <sup>i</sup> —Mn1—O1 <sup>iii</sup>       | 91.32 (5)   | P2—O3—Mn2                              | 137.03 (8)  |
| O1 <sup>ii</sup> —Mn1—O1 <sup>iii</sup>      | 180.0       | P2—O4—Mn1                              | 132.54 (8)  |
| O6 <sup>iv</sup> —Mn2—O6                     | 180.0       | P3—O5—Mn1                              | 166.25 (10) |
| O6 <sup>iv</sup> —Mn2—O3 <sup>iv</sup>       | 90.22 (5)   | P1—O6—Mn2                              | 133.97 (8)  |
| O6—Mn2—O3 <sup>iv</sup>                      | 89.78 (5)   | C1—N1—C2                               | 108.22 (13) |
| O6 <sup>iv</sup> —Mn2—O3                     | 89.78 (5)   | N1—C1—C3                               | 103.77 (14) |
| O6—Mn2—O3                                    | 90.22 (5)   | N1—C2—C4                               | 105.00 (15) |
| O3 <sup>iv</sup> —Mn2—O3                     | 180.0       | C1—C3—C4                               | 103.10 (16) |
| O6 <sup>iv</sup> —Mn2—O2 <sup>v</sup>        | 92.48 (6)   | C2—C4—C3                               | 103.11 (16) |

| <b>[EtA]Mn(H<sub>2</sub>POO)<sub>3</sub></b> |             |                                       |             |
|----------------------------------------------|-------------|---------------------------------------|-------------|
| Mn1—O1 <sup>iv</sup>                         | 2.1798 (13) | Mn2—O5 <sup>i</sup>                   | 2.1512 (15) |
| Mn1—O1                                       | 2.1798 (13) | P1—O1                                 | 1.5027 (14) |
| Mn1—O2 <sup>iv</sup>                         | 2.1889 (13) | P1—O3                                 | 1.5035 (14) |
| Mn1—O2                                       | 2.1888 (13) | P3—O5                                 | 1.4777 (16) |
| Mn1—O6 <sup>ix</sup>                         | 2.1881 (14) | P3—O6                                 | 1.5011 (15) |
| Mn1—O6 <sup>x</sup>                          | 2.1881 (14) | P21—O2                                | 1.4857 (17) |
| Mn2—O3 <sup>xi</sup>                         | 2.2043 (12) | P21—O4                                | 1.4710 (18) |
| Mn2—O3 <sup>v</sup>                          | 2.2043 (12) | O1A—C1                                | 1.419 (3)   |
| Mn2—O4 <sup>i</sup>                          | 2.1565 (14) | N1—C2                                 | 1.481 (3)   |
| Mn2—O4                                       | 2.1565 (14) | C2—C1                                 | 1.505 (3)   |
| Mn2—O5                                       | 2.1511 (15) |                                       |             |
|                                              |             |                                       |             |
| O1 <sup>iv</sup> —Mn1—O1                     | 180.0       | O5 <sup>i</sup> —Mn2—O3 <sup>xi</sup> | 88.50 (6)   |
| O1 <sup>iv</sup> —Mn1—O2 <sup>iv</sup>       | 94.65 (6)   | O5 <sup>i</sup> —Mn2—O3 <sup>v</sup>  | 91.50 (6)   |
| O1—Mn1—O2 <sup>iv</sup>                      | 85.35 (6)   | O5—Mn2—O3 <sup>xi</sup>               | 91.50 (6)   |
| O1 <sup>iv</sup> —Mn1—O2                     | 85.35 (6)   | O5—Mn2—O4 <sup>i</sup>                | 86.38 (6)   |
| O1—Mn1—O2                                    | 94.65 (6)   | O5 <sup>i</sup> —Mn2—O4               | 86.38 (6)   |
| O1 <sup>iv</sup> —Mn1—O6 <sup>ix</sup>       | 89.36 (5)   | O5—Mn2—O4                             | 93.62 (6)   |
| O1 <sup>iv</sup> —Mn1—O6 <sup>x</sup>        | 90.64 (5)   | O5 <sup>i</sup> —Mn2—O4 <sup>i</sup>  | 93.62 (6)   |
| O1—Mn1—O6 <sup>x</sup>                       | 89.36 (5)   | O5—Mn2—O5 <sup>i</sup>                | 180.00 (8)  |
| O1—Mn1—O6 <sup>ix</sup>                      | 90.64 (5)   | O1—P1—O3                              | 116.28 (8)  |
| O2—Mn1—O2 <sup>iv</sup>                      | 180.0       | O5—P3—O6                              | 115.51 (9)  |
| O6 <sup>x</sup> —Mn1—O2 <sup>iv</sup>        | 90.55 (6)   | O4—P22—O2                             | 123.3 (5)   |
| O6 <sup>ix</sup> —Mn1—O2                     | 90.54 (6)   | P1—O1—Mn1                             | 125.62 (8)  |
| O6 <sup>ix</sup> —Mn1—O2 <sup>iv</sup>       | 89.45 (6)   | P21—O2—Mn1                            | 139.05 (12) |
| O6 <sup>x</sup> —Mn1—O2                      | 89.46 (6)   | P22—O2—Mn1                            | 147.1 (3)   |
| O6 <sup>ix</sup> —Mn1—O6 <sup>x</sup>        | 180.0       | P1—O3—Mn2 <sup>xii</sup>              | 119.96 (7)  |
| O3 <sup>v</sup> —Mn2—O3 <sup>xi</sup>        | 180.0       | P21—O4—Mn2                            | 146.63 (14) |
| O4 <sup>i</sup> —Mn2—O3 <sup>xi</sup>        | 91.76 (5)   | P22—O4—Mn2                            | 164.8 (4)   |
| O4—Mn2—O3 <sup>xi</sup>                      | 88.24 (5)   | P3—O5—Mn2                             | 135.75 (10) |
| O4 <sup>i</sup> —Mn2—O3 <sup>v</sup>         | 88.24 (5)   | P3—O6—Mn1 <sup>xiii</sup>             | 133.17 (9)  |
| O4—Mn2—O3 <sup>v</sup>                       | 91.76 (5)   | O1A—C1—C2                             | 112.77 (18) |
| O4 <sup>i</sup> —Mn2—O4                      | 180.0       | N1—C2—C1                              | 112.82 (17) |
| O5—Mn2—O3 <sup>v</sup>                       | 88.50 (6)   |                                       |             |

Symmetry code(s): (i) -x+1, -y+1, -z+1; (ii) -x+1/2, y-1/2, -z+3/2; (iii) x+1/2, -y+3/2, z-1/2; (iv) -x, -y+2, -z+1; (v) -x+1, -y+2, -z+1; (vi) x-1, y, z; (vii) -x+1/2, y+1/2, -z+3/2; (viii) x+1, y, z; (ix) x-1/2, -y+3/2, z+1/2; (x) -x+1/2, y+1/2, -z+1/2; (xi) x, y-1, z; (xii) x, y+1, z; (xiii) -x+1/2, y-1/2, -z+1/2.

**Table S3.** Selected hydrogen-bond parameters.

| $D-H\cdots A$                                | $D-H$ (Å) | $H\cdots A$ (Å) | $D\cdots A$ (Å) | $D-H\cdots A$ (°) |
|----------------------------------------------|-----------|-----------------|-----------------|-------------------|
| <b>[Pyr]Mn(H<sub>2</sub>POO)<sub>3</sub></b> |           |                 |                 |                   |
| N1—H1 $\cdots$ O1                            | 0.89      | 1.93            | 2.8069 (19)     | 166.9             |
| N1—H2 $\cdots$ O2 <sup>i</sup>               | 0.89      | 2.10            | 2.8665 (19)     | 144.3             |
| <b>[EtA]Mn(H<sub>2</sub>POO)<sub>3</sub></b> |           |                 |                 |                   |
| O1A—H1A $\cdots$ O6                          | 0.74 (2)  | 2.03 (2)        | 2.766 (2)       | 174 (3)           |
| N1—H1C $\cdots$ O3 <sup>ii</sup>             | 0.89      | 1.95            | 2.828 (2)       | 167.1             |
| N1—H1D $\cdots$ O1 <sup>iii</sup>            | 0.89      | 2.11            | 2.942 (2)       | 156.1             |
| N1—H1D $\cdots$ O2 <sup>iv</sup>             | 0.89      | 2.54            | 3.123 (2)       | 123.9             |
| N1—H1E $\cdots$ O1A <sup>v</sup>             | 0.89      | 2.12            | 2.999 (2)       | 169.2             |

Symmetry code(s): (i)  $x-1/2, -y+3/2, z+1/2$ ; (ii)  $x+1/2, -y+3/2, z-1/2$ ; (iii)  $-x+1/2, y-3/2, -z+1/2$ ; (iv)  $x+1/2, -y+1/2, z-1/2$ ; (v)  $-x+3/2, y-1/2, -z+1/2$ .

**Table S4.** Comparison of distortion factors ( $\delta$ ,  $\sigma$ ,  $\Delta$ ), Mn-Mn and Mn-O distances, unit cell volumes per formula unit (V/Z), tolerance factors (TF), Mn-O-P angles, Neel temperatures ( $T_N$ ) and PL band positions for all manganese hypophosphite simple perovskites at room temperature (except of triazolium analogue for which magnetic and optical properties are not known). For [GUA]Mn(H<sub>2</sub>POO)<sub>3</sub>, data correspond to triclinic phase.

| Cation<br>(ionic size<br>in pm) | TF   | V/Z<br>(Å <sup>3</sup> ) | $\delta$<br>(%) | $\sigma$ (deg. <sup>2</sup> ) | $\Delta$ (Å)<br>10 <sup>-5</sup> | Mn···Mn (Å)<br>(average) | Mn-O<br>(Å)<br>average  | Mn-O-P (°)<br>(average)   | $T_N$<br>(K) | PL<br>(nm) |
|---------------------------------|------|--------------------------|-----------------|-------------------------------|----------------------------------|--------------------------|-------------------------|---------------------------|--------------|------------|
| FA (253)                        | 0.86 | 251.4                    | 10.6            | 3.3                           | 0.09                             | 6.35-6.89 (6.51)         | 2.194                   | 134.94-143.33<br>(138.09) | 2.4          | 656        |
| IM (258)                        | 0.87 | 283.0                    | 1.35            | 9.1<br>14.5                   | 7.3<br>7.1                       | 6.25-6.79 (6.61)         | 2.181<br>2.173          | 128.99-156.3<br>(135.59)  | 5.0          | 646        |
| MHy (264)                       | 0.88 | 269.4                    | 0.44            | 8.7                           | 3.0                              | 6.38-6.65 (6.48)         | 2.1760                  | 127.37-156.35<br>(138.23) | 6.5          | 686        |
| DMA<br>(272)                    | 0.90 | 296.0                    | 0.17            | 4.1<br>8.9<br>9.1             | 3.1<br>7.5<br>2.9                | 6.63-6.71 (6.67)         | 2.171<br>2.165<br>2.162 | 130.81-153.5<br>(139.25)  | 3.4          | 668        |
| GUA (278)                       | 0.91 | 280.4                    | 0.5             | 2.3                           | 32.0                             | 6.52-6.60 (6.56)         | 2.188                   | 126.93-141.23<br>(132.40) | 6.5          | ?          |
| Pyr (320)                       | 1.01 | 300.0                    | 0.18            | 1.1<br>2.6                    | 4.6<br>9.9                       | 6.69-6.71 (6.70)         | 2.182<br>2.182          | 129.87-166.25<br>(139.03) | 6.0          | 677        |
| EtA (344)                       | 1.06 | 281.3                    | 0.39            | 6.7<br>8.1                    | 12.1<br>0.4                      | 6.47-6.74 (6.56)         | 2.171<br>2.186          | 119.96-164.80<br>(138.69) | 7.0          | 689        |

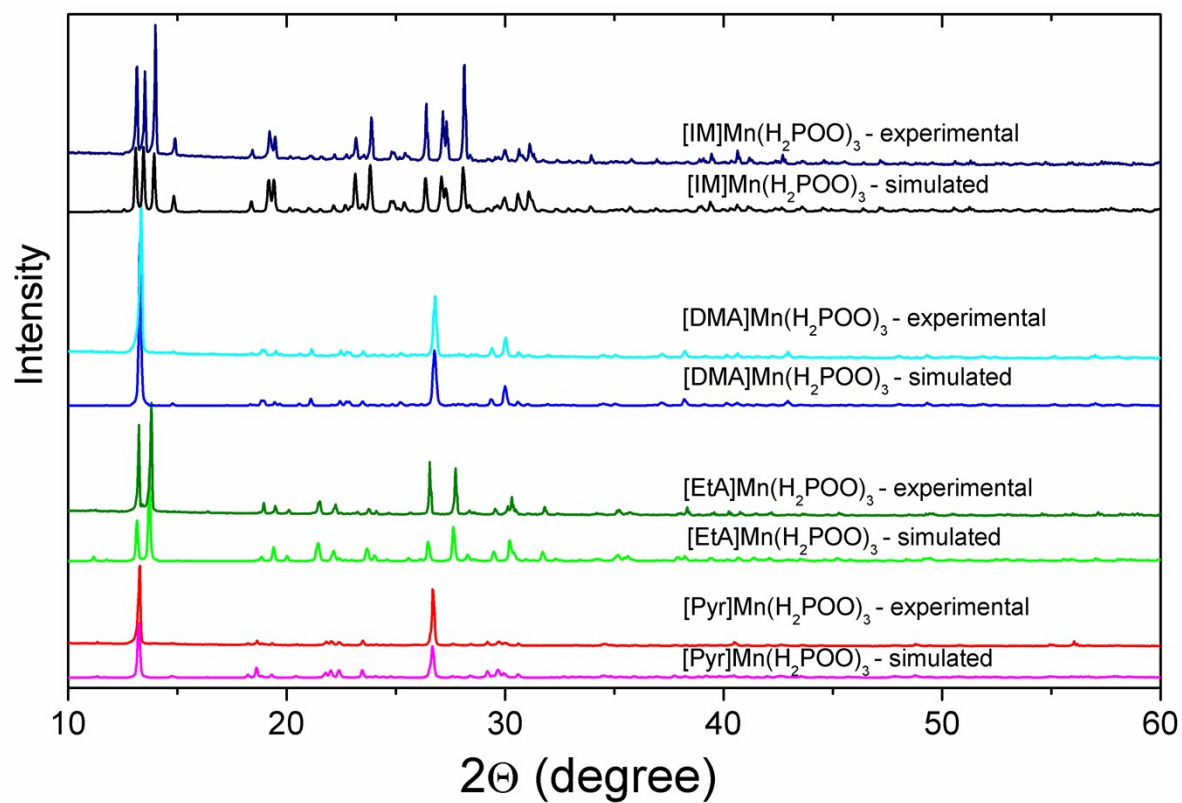

Figure S1. Experimental XRD patterns of the studied compounds together with the calculated ones based on the RT crystal structures.

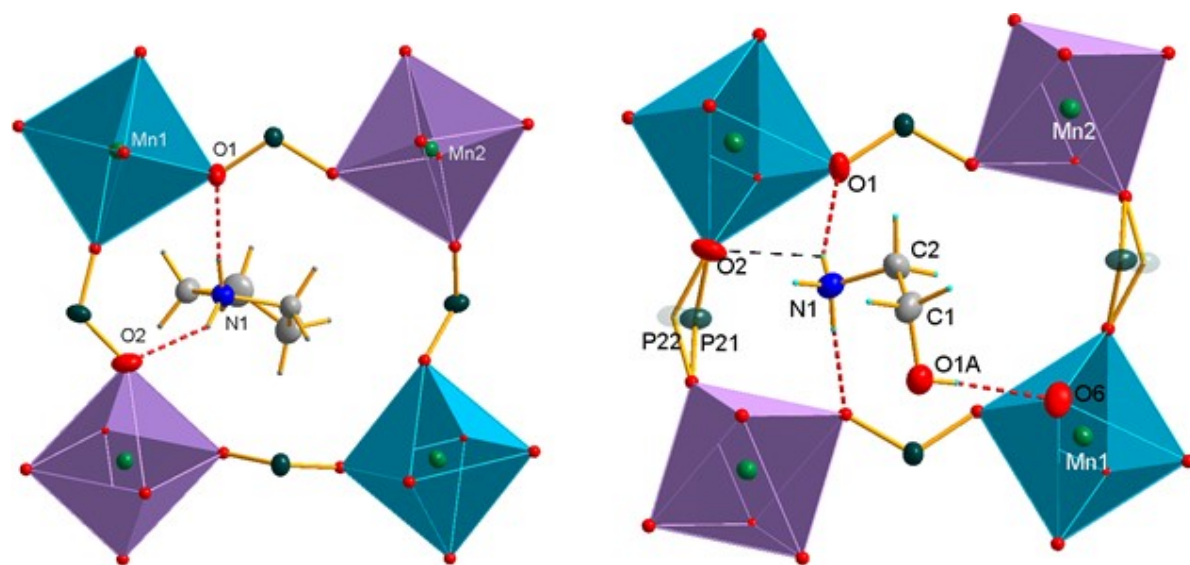

Figure S2. Atom numbering scheme and H-bonds in Pyr (left) and EtA (right) Mn-hypophosphites.



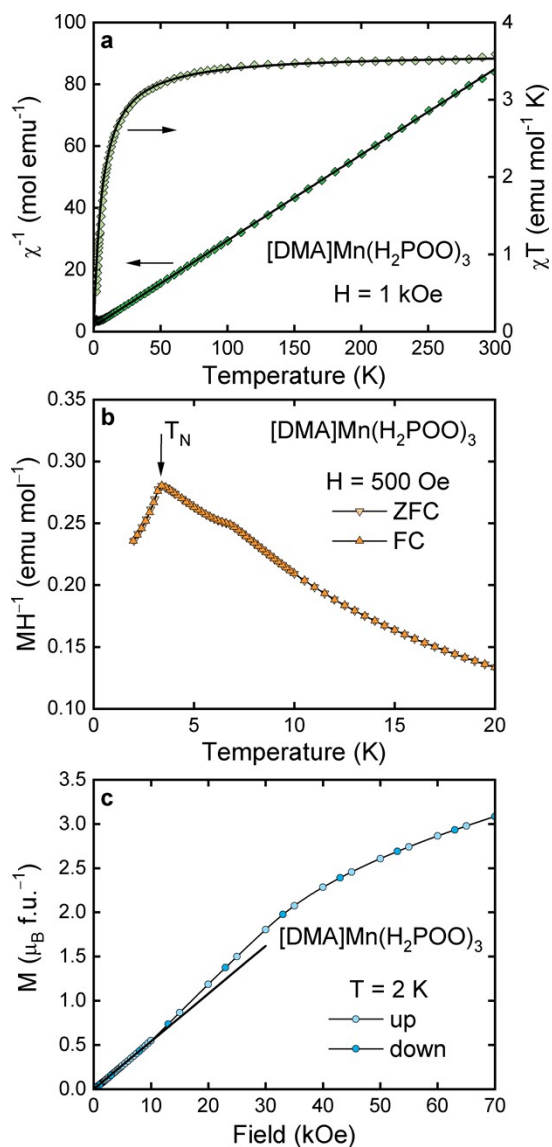

Figure S3. (a) Temperature dependence of inverse DC magnetic susceptibility  $\chi^{-1}$  (left axis) and a product  $\chi T$  (right axis) of  $[\text{DMA}]\text{Mn}(\text{H}_2\text{POO})_3$  measured in constant magnetic field  $H$ ; thick solid lines are a fit of the Curie-Weiss law to the experimental data (for details see the text). (b) LT magnetization  $M$  divided by magnetic field  $H$  measured in the ZFC and FC regimes (bright and dark symbols, respectively); the arrow marks the Néel temperature  $T_N$ . (c) Magnetization  $M$  (expressed as a magnetic moment per formula unit) as a function of increasing and decreasing field  $H$  (bright and dark symbols, respectively); the solid line shows linear behavior of  $M(H)$  in low fields.

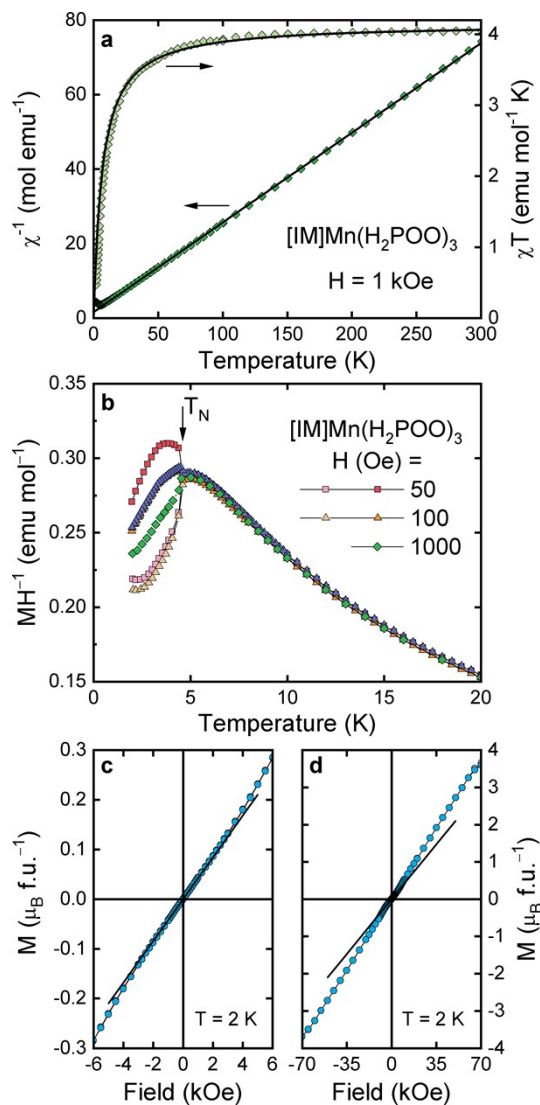

Figure S4. (a)  $\chi^{-1}(T)$  (left axis) and  $\chi T(T)$  (right axis) of  $[\text{IM}]\text{Mn}(\text{H}_2\text{POO})_3$ ; thick solid lines are the Curie-Weiss fit (for details see the text). (b)  $MH^{-1}(T)$  with the ordering temperature  $T_N$  marked by an arrow, measured in the ZFC and FC regimes (bright and dark symbols, respectively). (c,d)  $M$  measured as a function of increasing and decreasing field (bright and dark symbols, respectively) and plotted in two different field ranges; the solid lines show linear part of  $M(H)$ .

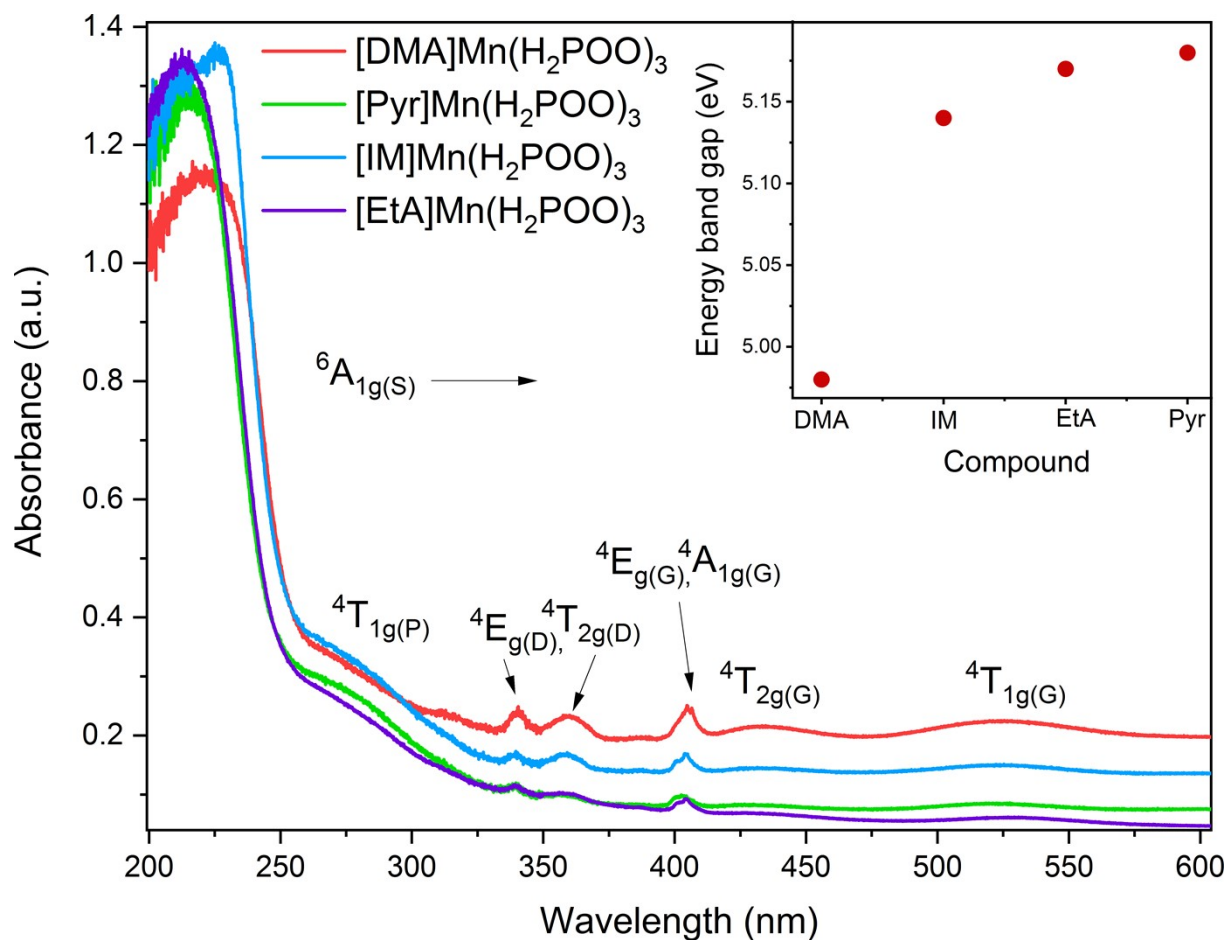

Figure S5. Room temperature absorption spectra of the investigated hypophosphite compounds with assigned  $\text{Mn}^{2+}$  absorption bands. The inset shows the energy band gap values ( $E_g$ ) of the investigated compounds.

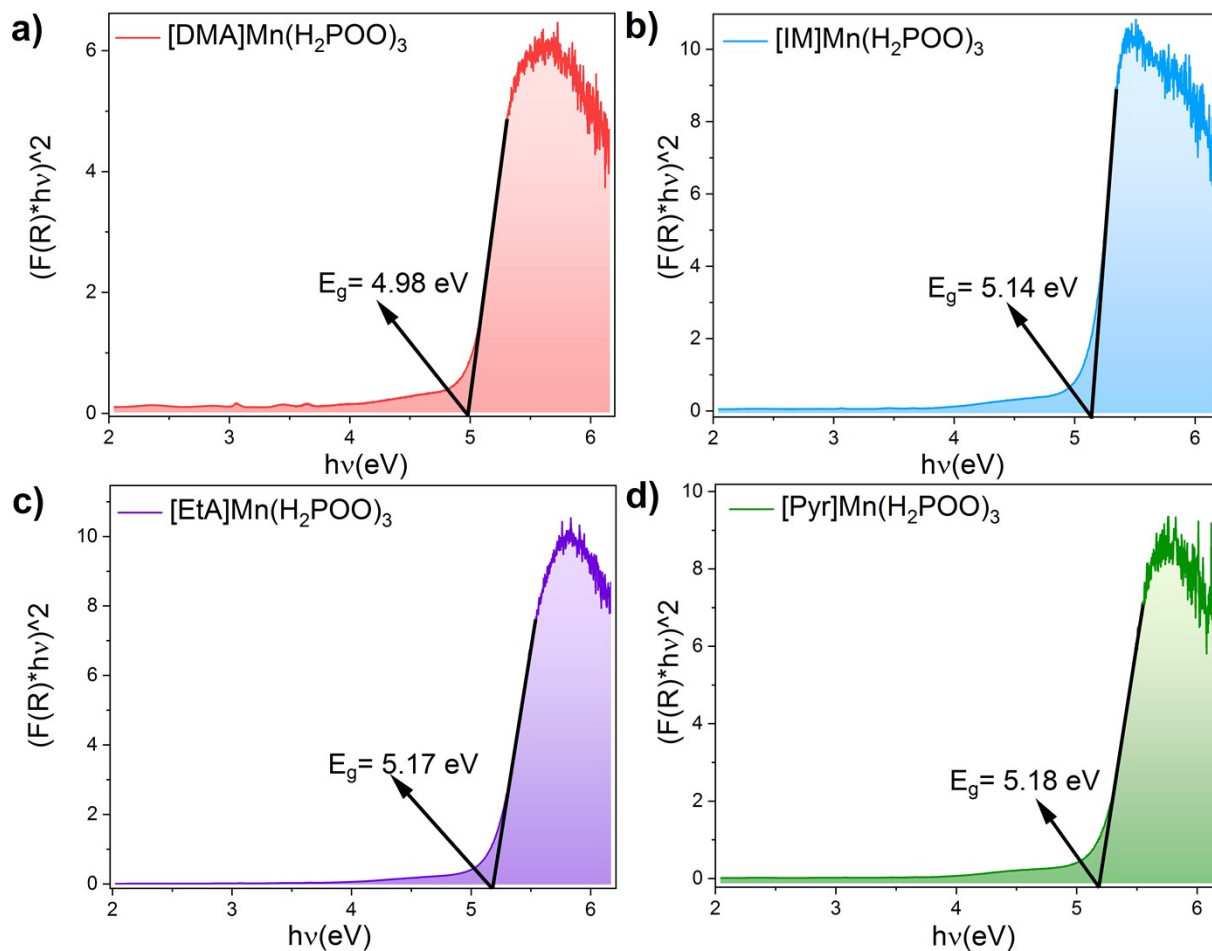

Figure S6. The energy band gap of [DMA]Mn(H<sub>2</sub>POO)<sub>3</sub> (a) [IM]Mn(H<sub>2</sub>POO)<sub>3</sub> (b), [EtA]Mn(H<sub>2</sub>POO)<sub>3</sub> (c), and [Pyr]Mn(H<sub>2</sub>POO)<sub>3</sub> (d) determined using Kubelka-Munk relation.

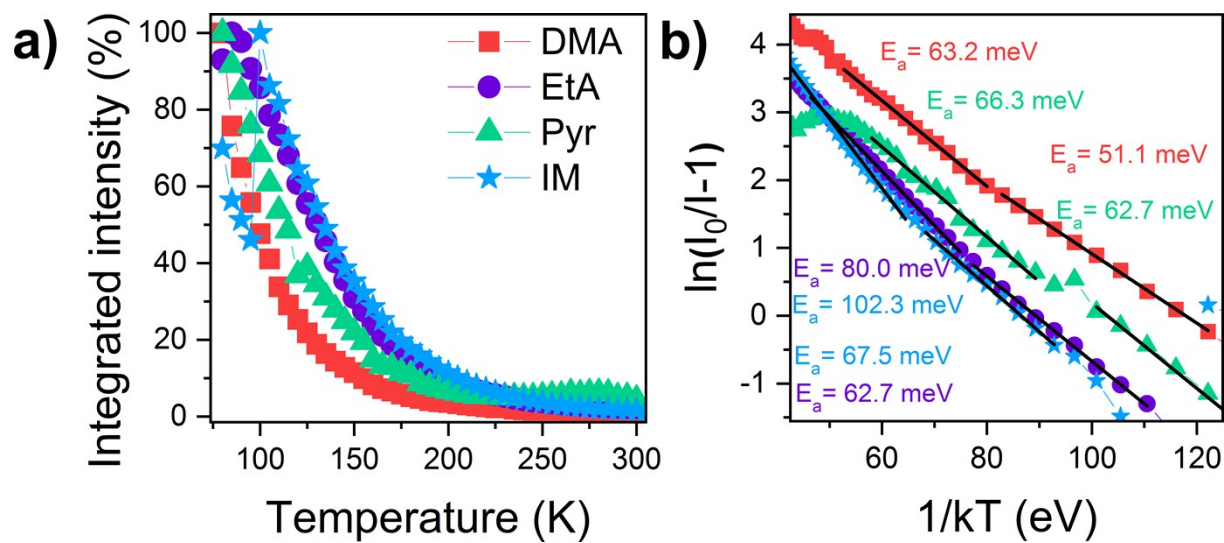

Figure S7. Changes of the PL integrated intensity of the investigated compounds with increasing temperature (a) and the energy activation ( $E_a$ ) of thermal quenching (b).
